# Supplementary material
Source: publisher figshare collection journal article supplement (https://karger.figshare.com/articles/dataset/_/5484658)
Supplement: Supplementary file 2 [file 1]

## Appendix 2

### Heart–Brain Connection consortium members

**Academic Medical Center (AMC), Amsterdam:** (Department of Pathology) Mat J.A.P. Daemen, MD, PhD, Olga C.G. Stam, MD, Sanny Scheffer, MSc, Eelco Soeteman, MSc; **Erasmus University Medical Center (ErasmusMC), Rotterdam:** (Biomedical Imaging Group Rotterdam, Departments of Medical Informatics and Radiology & Nuclear Medicine) Wiro J. Niessen, PhD, Esther E. Bron, PhD, Hakim Achterberg, MSc, (Department of Epidemiology) M. Arfan Ikram, MD, PhD, Frank J. Wolters, MD, Edith M.A. Nolet, René A. Molhoek, BA, Anneke H. Korving-de Roos, (Department of Neurology) Peter J. Koudstaal, MD, PhD, (Department of Radiology) Lydia Buist-Ezerman, Charlotte Bruidegom-van Heerden; **Leiden University Medical Center (LUMC), Leiden:** (Department of Gerontology and Geriatrics) Anton J.M. de Craen, PhD, Gerard J. Blauw, MD, PhD, Anne Suzanne Bertens, MD, Abi A. Akintola, MD, Sandra Raaijmakers, Marjan J.T. van der Elst, (Department of Radiology) Mark A. van Buchem, MD, PhD, Albert de Roos, MD, PhD, Mathijs Buijs, MD, Elmi J.C.M. van Beelen, Jos J.M. Westenberg, PhD, Jeroen van der Grond, PhD, (Division of Image Processing, Department of Radiology) Rob J. van der Geest, PhD, Rahil Shahzad, PhD, Boudewijn P.F. Lelieveldt, PhD, (C.J. Gorter Center for high field MRI, Department of Radiology) Matthias J. van Osch, PhD; (Department of Public Health and Primary Care) Anja Garstman; **Maastricht University Medical Center (MUMC), Maastricht:** (Department of Cardiology) Hans-Peter Brunner-La Rocca, MD, PhD, Nick G.H.M. Marcks, MD, Danielle E.G. Jeurissen-Bekkering, Desiree J.M. Rutten, MD, (Department of Neurology) Robert J. van Oostenbrugge, MD, PhD, Julie Staals, MD, PhD, Tugba Kalay, MD, Eefje Cleophas, MA, (Department of Psychiatry and Psychology) Frans R.J. Verhey, MD, PhD, Annelies A. Duits, PhD, Daisy Jeurissen Ramakers; **University Medical Center Utrecht (UMCU), Utrecht:** (Department of Neurology, Brain Center Rudolf Magnus) Geert Jan Biessels, MD, PhD, L. Jaap Kappelle, MD, PhD, Eline A. Oudeman, MD, Doeschka A. Ferro, MD, Laurien P. Onkenhout, MD, Karin J. Flapper; (Department of Radiology/Imaging Sciences) Jeroen Hendrikse, MD, PhD, Birgitta K. Velthuis, MD, Jaco J.M. Zwanenburg, PhD; (Julius Center for Health Sciences and Primary Care) Michiel L. Bots, MD, PhD, Jacoba P. Greving, PhD; **VU University Medical Center (VUmc), Amsterdam** (Alzheimer Center & Department of Neurology, Neuroscience Campus Amsterdam) Wiesje M. van der Flier, PhD, Astrid M. Hooghiemstra, PhD, Annebet E. Leeuwis, MSc,

Leonie Franken, MSc, Anne Peters, MSc; (Department of Cardiology) Albert. C van Rossum, MD, PhD, Robin Nijveldt, MD, PhD, Raquel Amier, MD.
